# Supplementary material
Source: ML conference proceedings conference paper supplement (https://openreview.net/forum?id=16kX08MCav)
Supplement: supplementary_material [file supplementary_details.pdf › supplementary_details.pdf]

## 1 A Theory justification

2 In the given appendix, we provide the proofs for our theory part.

3 *Lemma 1.* Consider the  $\alpha_i$  term:

$$\alpha_i = \frac{F(l_i, \theta)}{\sum_{j=1}^L F(l_j, \theta)} \leq \frac{C_2'(\theta)}{\sum_{j=1}^L C_1'(\theta)} \leq \frac{C_2(\theta)}{L}, \quad (1)$$

4 since the function is continuous on a compact space. The lower bound works the same.

5 For the proof of the corollary, notice that  $l_i = \mathbf{q}^\top \mathbf{k}_i$ , therefore  $|l_i|$  is bounded by norm of  $\|\mathbf{q}\| \|\mathbf{k}\|$ .

6 Hence, we have the following bound.  $\square$

7 *Theorem 1.* 1. Here we have fixed  $I_N = \{i_1, \dots, i_N\} \subset [1, \dots, L]$ . Therefore, we have:

$$\tilde{d} = \sum_{i \in I \setminus I_N} \left\| \alpha_i x_i - \sum_{j \in I_N} \alpha_j x_j \right\| \leq \sum_{i \in I \setminus I_N} \sum_{j \in I_N} \alpha_j \left\| \frac{\alpha_i}{\bar{\alpha}_N} x_i - x_j \right\| = \quad (2)$$

8

$$\sum_{i \in I \setminus I_N} \sum_{j \in I_N} \alpha_j \left\| \frac{\alpha_i}{\bar{\alpha}_N} x_i - \frac{\alpha_i}{\bar{\alpha}_N} x_j + \frac{\alpha_i}{\bar{\alpha}_N} x_j - x_j \right\| \leq \quad (3)$$

$$\sum_{i \in I \setminus I_N} \sum_{j \in I_N} \alpha_j \left( \frac{\alpha_i}{\bar{\alpha}_N} d_1 + \|x_j\| \left| 1 - \frac{\alpha_i}{\bar{\alpha}_N} \right| \right) = \quad (4)$$

$$(1 - \bar{\alpha}_N) d_1 + \max_{j \in I_N} \|x_j\| [\bar{\alpha}_N (L - N) - (1 - \bar{\alpha}_N)], \quad (5)$$

9 where  $d_1 = \max_{i \notin I_N, j \in I_N} \|x_i - x_j\|$ .

10 2. For the probability part:

$$E = \mathbb{E} \left[ \sum_{i \notin I_N} \|\alpha_i x_i - s\| \right] = \mathbb{E} \left[ \sum_{i=1}^L 1(i \notin I_N) \|\alpha_i x_i - s\| \right] \approx \quad (6)$$

$$\sum_{i=1}^L \mathbb{P}(i \notin I_N) \mathbb{E} [\|\alpha_i x_i - s\| | i \notin I_N]. \quad (7)$$

11 We can estimate both the expectation of norm and probability terms as follows:

$$\mathbb{P}(i \notin I_N) = \frac{L - N}{N}, \quad (8)$$

12

$$\mathbb{E} [\|\alpha_i x_i - s\| | i \notin I_N] = \mathbb{E} \left[ \left\| \alpha_i x_i - \sum_{j \neq i} 1(j \in I_N) \alpha_j x_j \right\| \middle| i \notin I_N \right] \approx \quad (9)$$

13

$$\left\| \alpha_i x_i - \frac{N}{L-1} \sum_{j \neq i} \alpha_j x_j \right\|. \quad (10)$$

14 As a result, we obtain:

$$E = \frac{L - N}{L} \sum_{i=1}^L \left\| \alpha_i \left( 1 + \frac{N}{L-1} \right) x_i - \frac{N}{L-1} \bar{x} \right\| + \varepsilon \quad (11)$$

15 The error term between the approximation and the true value can be estimated using Jensen's gap  
 16 bound:

$$\varepsilon_i = \mathbb{E}[\|\alpha_i x_i - s\| | i \notin I_N] - \|\alpha_i x_i - \mathbb{E}[s | i \notin I_N]\| \leq \frac{1}{2} \frac{N(L - N - 1) \sum_{j \neq i} \alpha_j^2 \|x_j\|^2}{\|\alpha_i x_i - s_i\|} \quad (12)$$

17 Therefore:

$$\varepsilon \leq \sum_{i=1}^L \frac{L - N}{L} \varepsilon_i \quad (13)$$

18 Now let's move to the corollary section.

19 1. Assuming  $N \ll L$  and  $L$  grows, we have:

$$E \approx \sum_{i=1}^L \alpha_i \|x_i\| \quad (14)$$

20 2. When  $N \rightarrow L$ , we have  $E \rightarrow 0$ , since number of outer elements goes to zero.

21 □

22 *Theorem 2.* We have:

$$\mathbb{E}[N_s] = \sum_{i \in I_N} \mathbb{1}(\|s - \alpha_i x_i\| \leq r) = \sum_{i \in I_N} \mathbb{P}(\|s - \alpha_i x_i\| \leq r) \quad (15)$$

23 Hence, we need to estimate the probability of the  $\alpha_i x_i$  being in the sphere.

24 Notice that  $\|\alpha_i x_i - s\|$  is bounded random variable. We can estimate it as  $\|\alpha_i x_i - s\| \in [0, 2M]$ .

25 Hence, we have a Hoeffding-type inequality:

$$\mathbb{P}(X_i \leq r) \leq \inf_t [e^{-rt} \mathbb{E} e^{X_i t}] \leq \exp \left[ \inf_t (-rt + t \mathbb{E} X_i + 4M^2 t^2) \right] \leq \exp \left[ -\frac{(r - \mathbb{E} X_i)^2}{16M^2} \right], \quad (16)$$

26 where expected value of  $X_i = \|s - \alpha_i x_i\|$  can be estimated as follows:

$$\mathbb{E} X_i \leq \sqrt{\mathbb{E} X_i^2}, \quad (17)$$

27 and for the squared norm, we have:

$$\|X_i\|^2 = \left\| \alpha_i x_i - \sum_{j \in I_N} \alpha_j x_j \right\|^2 = \left\| \sum_{j \in I_N, j \neq i} \alpha_j x_j \right\|^2 = \sum_{\substack{j, k \in I_N \\ j \neq i \\ k \neq i}} \alpha_j \alpha_k \langle x_i, x_j \rangle \leq \quad (18)$$

$$M^2 \sum_{\substack{j \in I_N \\ j \neq i}} \alpha_j^2 + \left( M^2 - \frac{\delta^2}{2} \right) \sum_{\substack{j, k \in I_N \\ j \neq k \neq i}} \alpha_j \alpha_k \equiv \xi_i^2, \quad (19)$$

28 where the last bound caused by condition  $\|x_i - x_j\|^2 \geq \delta^2$ .

29 Therefore, we have:

$$\mathbb{E}[N_s] \leq \sum_{i \in I_N} \exp \left[ -\frac{(r - \xi_i)^2}{16M^2} \right] \quad (20)$$

30 The lower bound is easier. Using Markov inequality and Cauchy-Schwarz (17):

$$\mathbb{P}(X_i \leq r) = 1 - \mathbb{P}(X_i > r) \leq 1 - \frac{\mathbb{E}X_i}{r} \geq 1 - \frac{\xi_i}{r} \quad (21)$$

31 Hence, we have:

$$N - \frac{1}{r} \sum_{i \in I_N} \xi_i \leq \mathbb{E}[N_s] \leq \sum_{i \in I_N} \exp \left[ -\frac{(r - \xi_i)^2}{16M^2} \right] \quad (22)$$

32 □

## 33 B Experiments

34 In the appendix, we provide details of the whole experiment setup and give the pseudocode we  
35 implemented for each figure.

### 36 System parameters

37 For the given research, we used the Apple M1 Pro chip with a 10-core CPU and 16GB of unified  
38 memory, based on ARM architecture.

### 39 Software framework

40 The models were implemented and examined using PyTorch [2], running on the Apple M1 Pro’s  
41 ARM-based CPU architecture to ensure efficient computation.

42 For the parallelization procedure, we used Joblib library [1].

### 43 Distance analysis

---

**Algorithm 1** Distance Analysis. Different  $L$  and fixed  $N$ .

---

**Require:** Text input, list of token lengths  $L_{\text{values}}$ , fixed  $N = 5$

**Ensure:** Averaged distance statistics across layers and heads

```

1: for  $L$  in  $L_{\text{values}}$  do
2:   Encode text using GPT-2 and extract attention matrices for all heads and layers
3:   for each (head, layer) in GPT-2 do
4:     for each token index  $t$  in  $1, \dots, L$  do
5:       Compute true distance  $\tilde{d}$  via Eq. (7)
6:       Compute upper bound  $d_{\text{max}}$  via Eq. (9)
7:       Compute expectation  $E$  via Eq. (10)
8:       Store  $(\tilde{d}, d_{\text{max}}, E)$ 
9:     end for
10:    Average distances across tokens
11:    Store result for (head, layer)
12:  end for
13:  Store all results for current  $L$ 
14: end for
15: return All distance statistics

```

---

---

**Algorithm 2** Distance Analysis. Different top- $N$  and fixed  $L$ 

---

**Require:** Text input, list of top- $N$  values  $N_{\text{values}}$ , fixed  $L = 1024$

**Ensure:** Averaged distance statistics across layers and heads

```
1: Encode text using GPT-2 and extract attention matrices for all heads and layers
2: for  $N$  in  $N_{\text{values}}$  do
3:   for each (head, layer) in GPT-2 do
4:     for each token index  $t$  in  $1, \dots, L$  do
5:       Compute true distance  $\tilde{d}$  via Eq. (7)
6:       Compute upper bound  $d_{\text{max}}$  via Eq. (9)
7:       Compute expectation  $E$  via Eq. (10)
8:       Store  $(\tilde{d}, d_{\text{max}}, E)$ 
9:     end for
10:    Average distances across tokens
11:    Store result for (head, layer)
12:  end for
13:  Store all results for current  $N$ 
14: end for
15: return All distance statistics
```

---

---

**Algorithm 3** Distance Analysis. Critical Top- $N$  detection.

---

**Require:** Text input,  $L$ , top- $N$  values  $N_{\text{values}}$ , significance level  $\alpha = 0.05$

**Ensure:** First  $N$  for which expected and true distances are statistically close

```
1: Encode text using GPT-2 and extract attention matrices
2: for  $N$  in  $N_{\text{values}}$  do
3:   Initialize list of relative errors
4:   for each (head, layer) in GPT-2 do
5:     for each token  $t$  in  $1, \dots, L$  do
6:       Compute true distance  $\tilde{d}$  via Eq. (7)
7:       Compute expected distance  $E$  via Eq. (10)
8:     end for
9:     Compute mean true distance  $\bar{d}$ 
10:    Compute mean expected distance  $\bar{E}$ 
11:    Store the  $\bar{d}$  and  $\bar{E}$ 
12:  end for
13:  if Kolmogorov-Smirnov( $\bar{d}, \bar{E}$ , significance level  $\alpha$ ) is true then
14:    return  $N$ 
15:  end if
16: end for
17: return  $-1$  ▷ No  $N$  meets the condition
```

---

44 **Geometrical analysis**

---

**Algorithm 4** Geometrical analysis. Separation Ratio and Bounds for Top-N Attention Tokens.

---

**Require:** Text input, sequence length  $L$ , top- $N$  values  $N_{\text{values}}$

**Ensure:** Box plots of  $N_s/N$  and its theoretical bounds

- 1: Encode text using GPT-2 and extract attention matrices
  - 2: Extract and normalize token embeddings
  - 3: **for**  $N$  in  $N_{\text{values}}$  **do**
  - 4:     **for** each (head, layer) in GPT-2 **do**
  - 5:         **for** each token  $t$  in  $1, \dots, L$  **do**
  - 6:             Compute  $N_s/N$  via direct counting
  - 7:             Compute lower and upper bounds from Theorem 2
  - 8:         **end for**
  - 9:         Average  $N_s/N$ , upper bound, and lower bound over all tokens
  - 10:        Store results for (head, layer)
  - 11:     **end for**
  - 12:     Store aggregated results for  $N$
  - 13: **end for**
  - 14: Generate box plots comparing true and theoretical values
- 

45 **Gradient analysis**

---

**Algorithm 5** Gradient Sensitivity Analysis

---

**Require:** Text, temperature values  $T_{\text{values}}$ , shift values  $\varepsilon_{\text{values}}$

**Ensure:** Sensitivity statistics across temperatures and shifts

- 1: Convert text to logits matrices for all (head, layer) pairs
  - 2: **for**  $T$  in  $T_{\text{values}}$  **do**
  - 3:     **for**  $\varepsilon$  in  $\varepsilon_{\text{values}}$  **do**
  - 4:         **for** each (head, layer) **do**
  - 5:             **for** each token  $t \in \{1, \dots, L\}$  **do**
  - 6:                 Sample unit vector  $v$  with  $\|v\|_2 = 1$
  - 7:                 Compute shifted logits  $l' = l + \varepsilon v$
  - 8:                 Compute softmax distributions  $\alpha = \text{softmax}(l/T)$ ,  $\alpha' = \text{softmax}(l'/T)$
  - 9:                 Compute sensitivity:  $\delta = \|\alpha' - \alpha\|_2 / \varepsilon$
  - 10:             **end for**
  - 11:             Average  $\delta$  over tokens
  - 12:         **end for**
  - 13:         Store maximum average  $\delta$  across (head, layer) for current  $\varepsilon$
  - 14:     **end for**
  - 15:     Store results for temperature  $T$
  - 16: **end for**
  - 17: **return** Sensitivity statistics
-

## 46 Time resources

47 Here, we provide the time execution for all algorithms:

| Algorithm | Time of execution | Parallelization |
|-----------|-------------------|-----------------|
| Alg. 1    | 24 min.           | No              |
| Alg. 2    | 37 min.           | No              |
| Alg. 3    | 17 h. 4min.       | Yes             |
| Alg. 4    | 7 min.            | No              |
| Alg. 5    | 1 min.            | No              |

Table 1: Comparison of algorithm execution times. The table references algorithms defined in Algorithms 1–5, highlighting their respective performance durations and whether they used parallelization.

## 48 References

- 49 [1] Joblib Development Team. Joblib: running python functions as pipeline jobs, 2020.
- 50 [2] A. Paszke, S. Gross, F. Massa, A. Lerer, J. Bradbury, G. Chanan, T. Killeen, Z. Lin, N. Gimeshein,  
51 L. Antiga, et al. Pytorch: An imperative style, high-performance deep learning library. In  
52 *Advances in Neural Information Processing Systems*, 2019.
